# Supplementary material for: The mechanism of ginger and its processed products in the treatment of estradiol valerate coupled with oxytocin-induced dysmenorrhea in miceviaregulating the TRP ion channel-mediated ERK1/2/NF-κB signaling pathway
Source: Royal Society of Chemistry journal article supplement (doi:10.1039/d2fo01845d), 2022-01-01
Supplement: d2fo01845d1.pdf [file d2fo01845d1.pdf]

The 1<sup>st</sup> time:

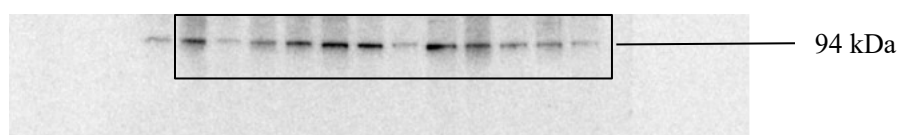

The 2<sup>nd</sup> time:

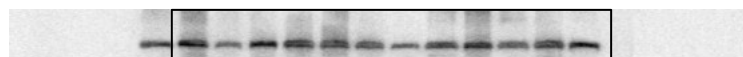

The 3<sup>rd</sup> time:

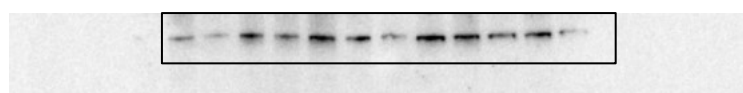

**Fig.4(A)-1** The original images of the western blotting of the expression level of TRPV1 in uterus of each group for three independent repeats. (From left to right in the red text box are Normal group, Control group, IBF group, RZL group, RZM group, RZH group, BGL group, BGM group, BGH group, GCL group, GCM group and GCH group, respectively. The first western blotting band is presented as a representative image in the manuscript.)

The 1<sup>st</sup> time:

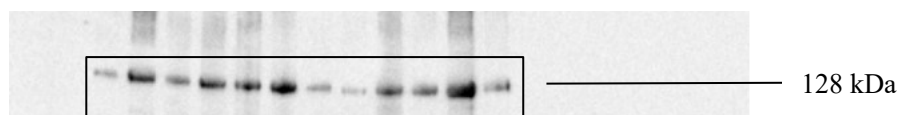

The 2<sup>nd</sup> time:

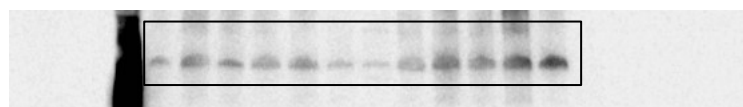

The 3<sup>rd</sup> time:

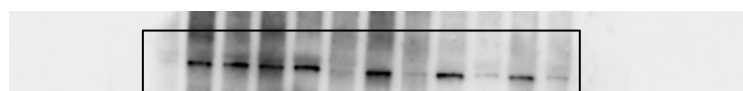

**Fig.4(A)-2** The original images of the western blotting of the expression level of TRPM8 in uterus of each group for three independent repeats. (From left to right are Normal group, Control group, IBF group, RZL group, RZM group, RZH group, BGL group, BGM group, BGH group, GCL group, GCM group and GCH group, respectively. The first western blotting band is presented as a representative image in the manuscript.)

The 1<sup>st</sup> time:

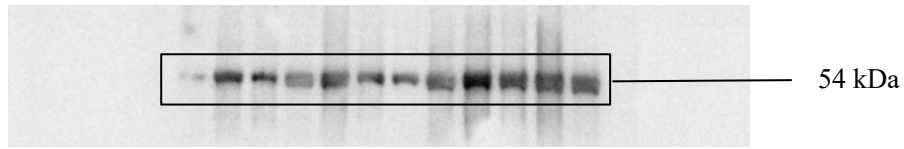

The 2<sup>nd</sup> time:

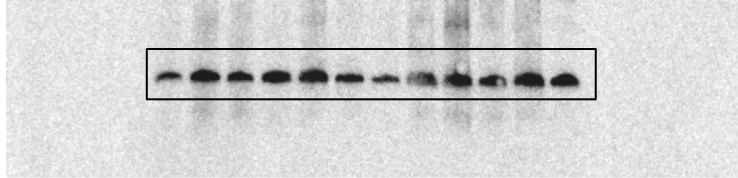

The 3<sup>rd</sup> time:

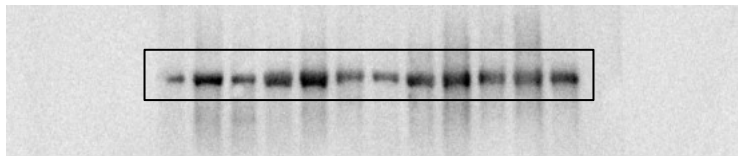

**Fig.4(A)-3** The original images of the western blotting of the expression level of CaMKII in uterus of each group for three independent repeats. (From left to right are Normal group, Control group, IBF group, RZL group, RZM group, RZH group, BGL group, BGM group, BGH group, GCL group, GCM group and GCH group, respectively. The first western blotting band is presented as a representative image in the manuscript.)

The 1<sup>st</sup> time:

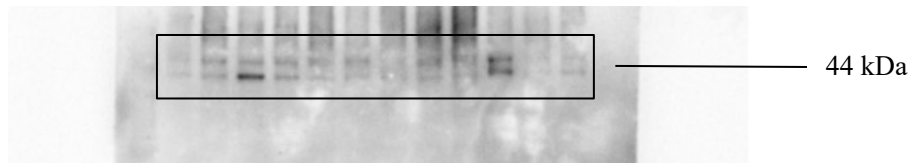

The 2<sup>nd</sup> time:

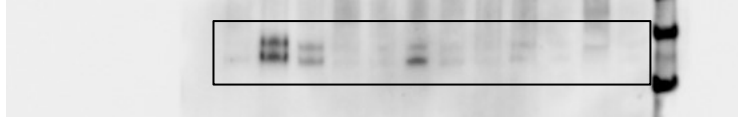

The 3<sup>rd</sup> time:

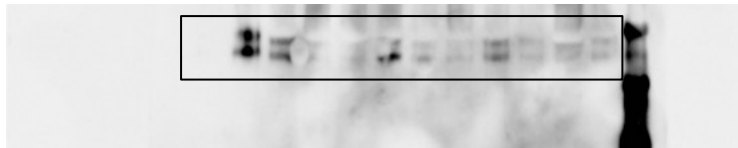

**Fig.4(A)-4** The original images of the western blotting of the expression level of ERK<sub>1/2</sub> in uterus of each group for three independent repeats. (From left to right are Normal group, Control group, IBF group, RZL group, RZM group, RZH group, BGL group, BGM group, BGH group, GCL group, GCM group and GCH group, respectively. The first western blotting band is presented as a representative image in the manuscript.)

The 1<sup>st</sup> time:

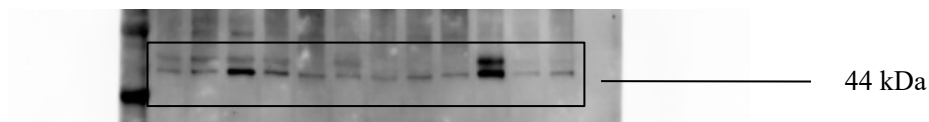

The 2<sup>nd</sup> time:

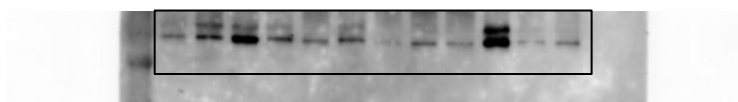

The 3<sup>rd</sup> time:

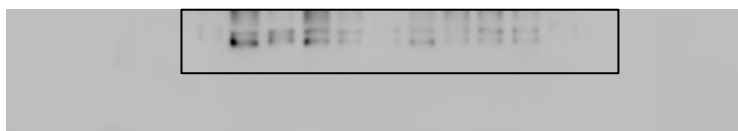

**Fig.4(A)-5** The original images of the western blotting of the expression level of p-ERK<sub>1/2</sub> in uterus of each group for three independent repeats. (From left to right are Normal group, Control group, IBF group, RZL group, RZM group, RZH group, BGL group, BGM group, BGH group, GCL group, GCM group and GCH group, respectively. The first western blotting band is presented as a representative image in the manuscript.)

The 1<sup>st</sup> time:

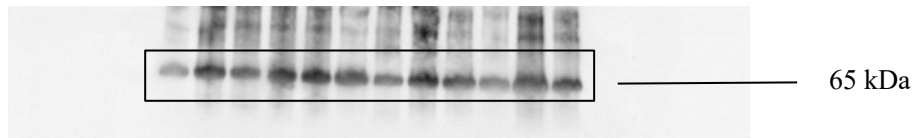

The 2<sup>nd</sup> time:

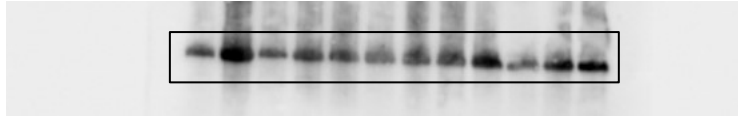

The 3<sup>rd</sup> time:

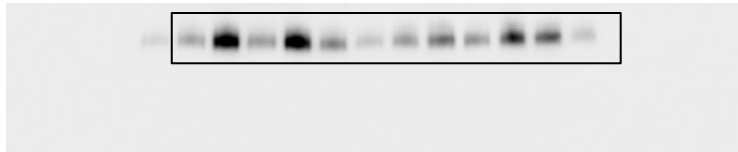

**Fig.4(A)-6** The original images of the western blotting of the expression level of NF- $\kappa$ B(p65) in uterus of each group for three independent repeats. (From left to right are Normal group, Control group, IBF group, RZL group, RZM group, RZH group, BGL group, BGM group, BGH group, GCL group, GCM group and GCH group, respectively. The first western blotting band is presented as a representative image in the manuscript.)

The 1<sup>st</sup> time:

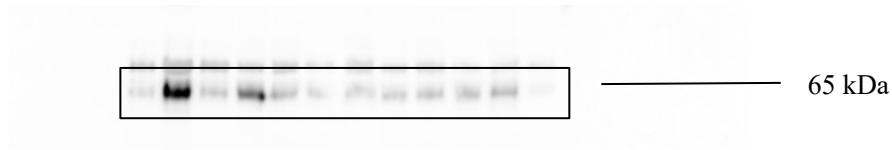

The 2<sup>nd</sup> time:

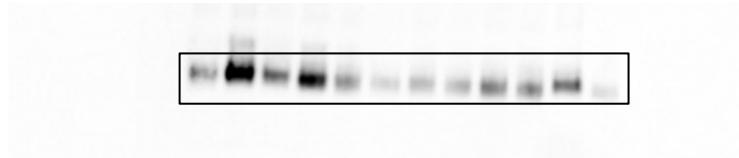

The 3<sup>rd</sup> time:

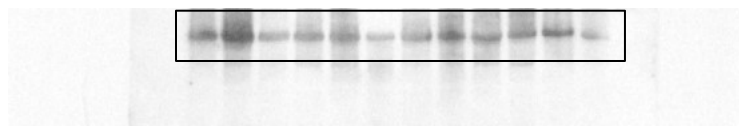

**Fig.4(A)-7** The original images of the western blotting of the expression level of p-NF- $\kappa$ B(p65) in uterus of each group for three independent repeats. (From left to right are Normal group, Control group, IBF group, RZL group, RZM group, RZH group, BGL group, BGM group, BGH group, GCL group, GCM group and GCH group, respectively. The first western blotting band is presented as a representative image in the manuscript.)

The 1<sup>st</sup> time:

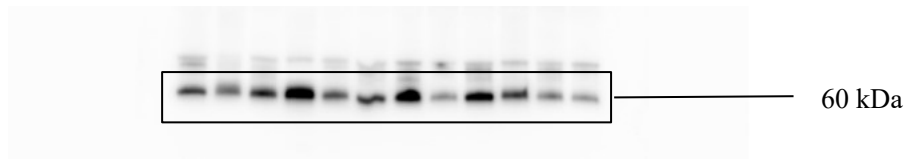

The 2<sup>nd</sup> time:

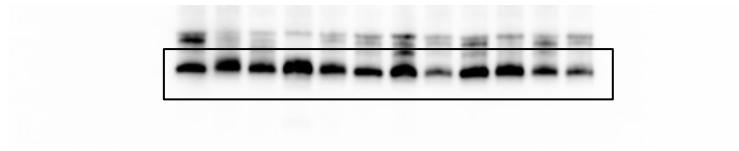

The 3<sup>rd</sup> time:

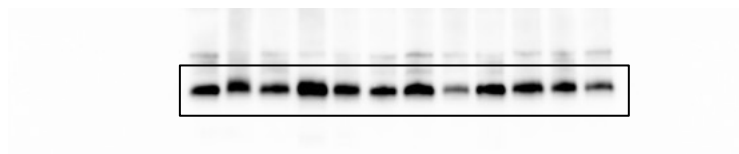

**Fig.4(A)-8** The original images of the western blotting of the expression level of  $\text{I}\kappa\text{B}\alpha$  in uterus of each group for three independent repeats. (From left to right are Normal group, Control group, IBF group, RZL group, RZM group, RZH group, BGL group, BGM group, BGH group, GCL group, GCM group and GCH group, respectively. The first western blotting band is presented as a representative image in the manuscript.)

The 1<sup>st</sup> time:

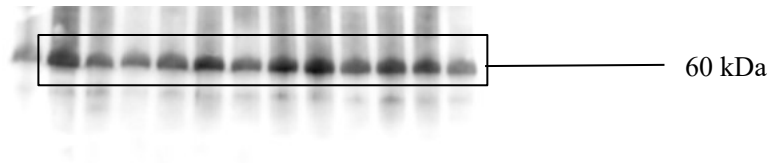

The 2<sup>nd</sup> time:

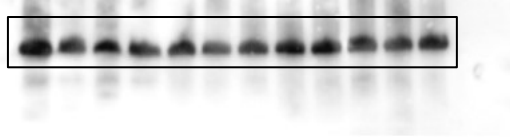

The 3<sup>rd</sup> time:

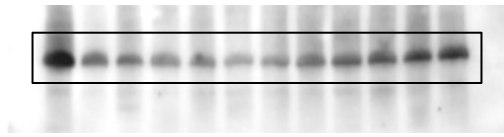

**Fig.4(A)-9** The original images of the western blotting of the expression level of p-I $\kappa$ B $_{\alpha}$  in uterus of each group for three independent repeats. (From left to right in the red text box are Normal group, Control group, IBF group, RZL group, RZM group, RZH group, BGL group, BGM group, BGH group, GCL group, GCM group and GCH group, respectively. The first western blotting band is presented as a representative image in the manuscript.)

The 1<sup>st</sup> time:

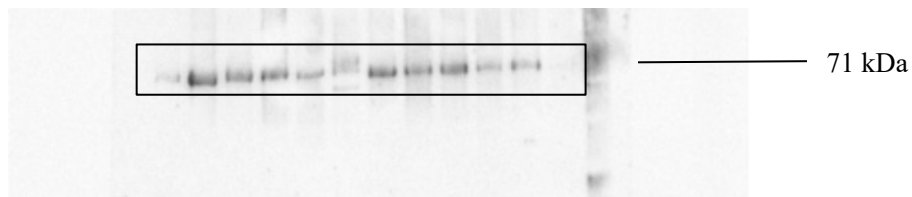

The 2<sup>nd</sup> time:

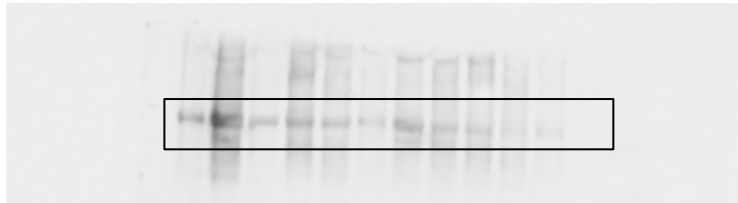

The 3<sup>rd</sup> time:

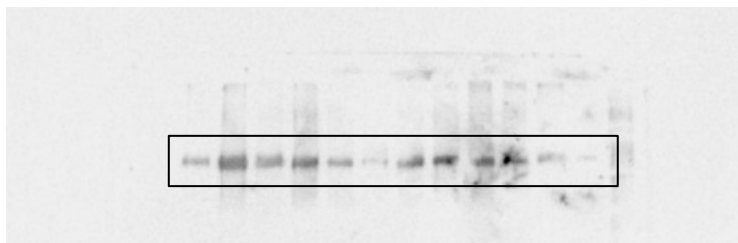

**Fig.4(A)-10** The original images of the western blotting of the expression level of COX-2 in uterus of each group for three independent repeats. (From left to right are Normal group, Control group, IBF group, RZL group, RZM group, RZH group, BGL group, BGM group, BGH group, GCL group, GCM group and GCH group, respectively. The first western blotting band is presented as a representative image in the manuscript.)

The 1<sup>st</sup> time:

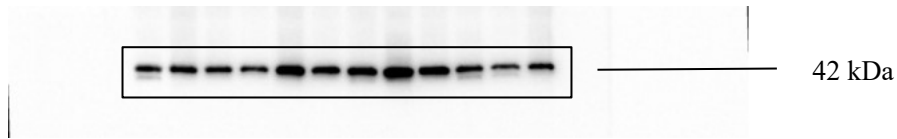

The 2<sup>nd</sup> time:

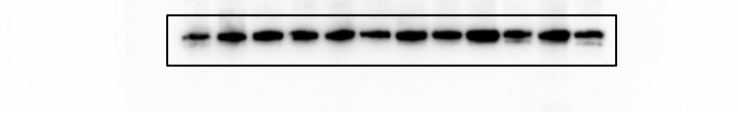

The 3<sup>rd</sup> time:

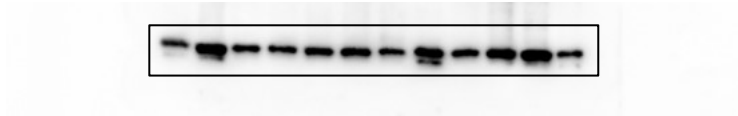

**Fig.4(A)-11** The original images of the western blotting of the expression level of  $\beta$ -actin in uterus of each group for three independent repeats. (From left to right are Normal group, Control group, IBF group, RZL group, RZM group, RZH group, BGL group, BGM group, BGH group, GCL group, GCM group and GCH group, respectively. The first western blotting band is presented as a representative image in the manuscript.)

The 1<sup>st</sup> time:

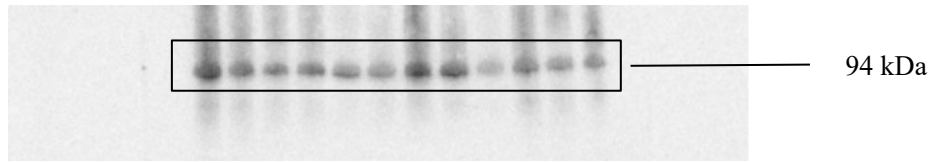

The 2<sup>nd</sup> time:

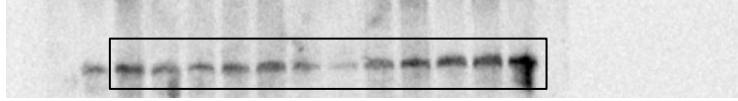

The 3<sup>rd</sup> time:

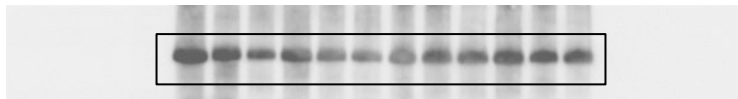

**Fig.4(B)-1** The original images of the western blotting of the expression level of TRPV1 in DRG of each group for three independent repeats. (From left to right are Normal group, Control group, IBF group, RZL group, RZM group, RZH group, BGL group, BGM group, BGH group, GCL group, GCM group and GCH group, respectively. The first western blotting band is presented as a representative image in the manuscript.)

The 1<sup>st</sup> time:

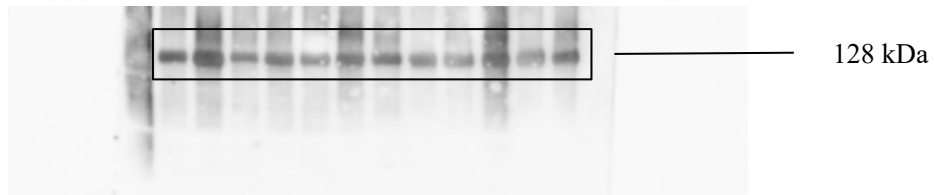

The 2<sup>nd</sup> time:

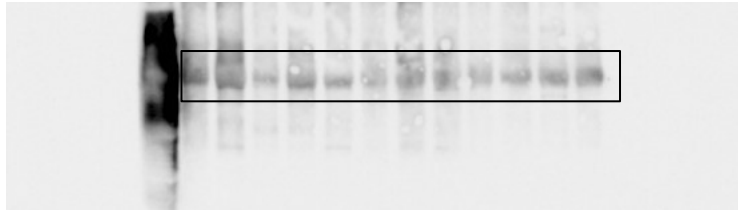

The 3<sup>rd</sup> time:

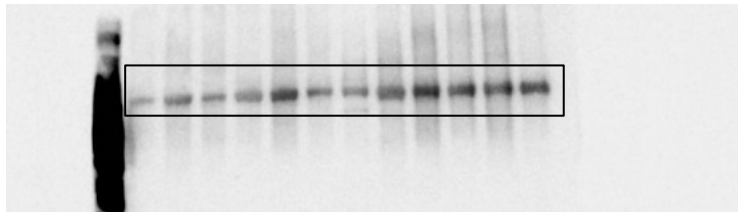

**Fig.4(B)-2** The original images of the western blotting of the expression level of TRPM8 in DRG of each group for three independent repeats. (From left to right are Normal group, Control group, IBF group, RZL group, RZM group, RZH group, BGL group, BGM group, BGH group, GCL group, GCM group and GCH group, respectively. The first western blotting band is presented as a representative image in the manuscript.)

The 1<sup>st</sup> time:

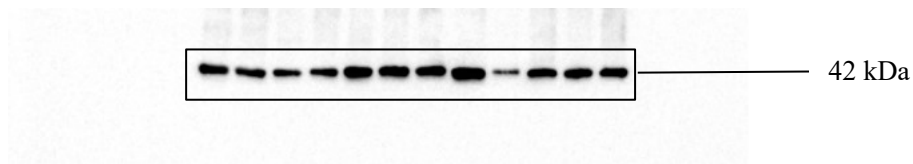

The 2<sup>nd</sup> time:

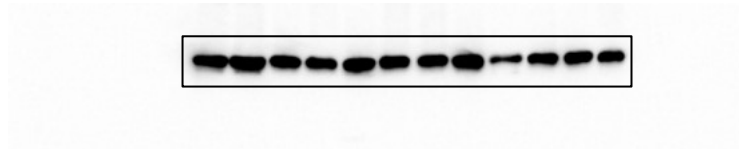

The 3<sup>rd</sup> time:

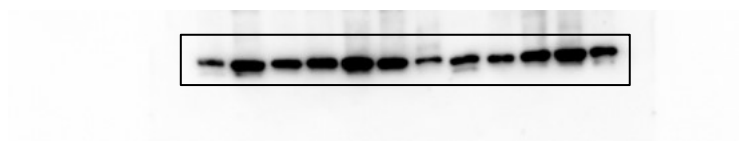

**Fig.4(B)-3** The original images of the western blotting of the expression level of  $\beta$ -actin in DRG of each group for three independent repeats. (From left to right are Normal group, Control group, IBF group, RZL group, RZM group, RZH group, BGL group, BGM group, BGH group, GCL group, GCM group and GCH group, respectively. The first western blotting band is presented as a representative image in the manuscript.)
