# Supplementary material for: The mechanism of ginger and its processed products in the treatment of estradiol valerate coupled with oxytocin-induced dysmenorrhea in miceviaregulating the TRP ion channel-mediated ERK1/2/NF-κB signaling pathway
Source: Royal Society of Chemistry journal article supplement (doi:10.1039/d2fo01845d), 2022-01-01
Supplement: d2fo01845d6.pdf [file d2fo01845d6.pdf]

**Table S1** The 6-gingerol, 10-gingerol, 6-shogaol and 8-shogaol content in RZ and RZPPs

|    | 6-gingerol (mg·g <sup>-1</sup> ) | 10-gingerol (mg·g <sup>-1</sup> ) | 6-shogaol (mg·g <sup>-1</sup> ) | 8-shogaol (mg·g <sup>-1</sup> ) |
|----|----------------------------------|-----------------------------------|---------------------------------|---------------------------------|
| RZ | 11.57±4.230                      | 1.533±1.397                       | 0.214±0.233                     | 0.830±0.908                     |
| BG | 7.59±1.798                       | 1.918±0.813                       | 0.341±0.807                     | 2.042±3.062                     |
| GC | 1.42±0.689                       | 0.476±0.242                       | 0.621±1.023                     | 3.115±5.212                     |

**Table S2** DQMs between RZ and BG

| No. | Name                                                                                                                                                                               | Up-Down |
|-----|------------------------------------------------------------------------------------------------------------------------------------------------------------------------------------|---------|
| 1   | Nudifloramide                                                                                                                                                                      | Down    |
| 2   | L-homoarginine                                                                                                                                                                     | Down    |
| 3   | [6]-gingerol                                                                                                                                                                       | Up      |
| 4   | (+)-carvone                                                                                                                                                                        | Down    |
| 5   | Phenamil                                                                                                                                                                           | Up      |
| 6   | Delsoline                                                                                                                                                                          | Up      |
| 7   | Glufosinate                                                                                                                                                                        | Down    |
| 8   | 3-propyl-2-methylpyrazine                                                                                                                                                          | Down    |
| 9   | Tyr-Met-Lys                                                                                                                                                                        | Down    |
| 10  | Leukotriene e4                                                                                                                                                                     | Up      |
| 11  | 4-hydroxy-3-methoxybenzyl alcohol                                                                                                                                                  | Up      |
| 12  | O-anisidine                                                                                                                                                                        | Down    |
| 13  | 4-methyl-1h-pyrazole                                                                                                                                                               | Down    |
| 14  | 2-(2',3',4'-trihydroxybutyl)quinoxaline                                                                                                                                            | Down    |
| 15  | 2-(4-amino-1-piperidinyl)ethanol                                                                                                                                                   | Down    |
| 16  | Pelletierine                                                                                                                                                                       | Down    |
| 17  | Glycodeoxycholic acid                                                                                                                                                              | Up      |
| 18  | Leucine                                                                                                                                                                            | Up      |
| 19  | 3-fluorophenmetrazine                                                                                                                                                              | Down    |
| 20  | Penicillic acid                                                                                                                                                                    | Down    |
| 21  | Methanone, [1-(5-fluoropentyl)-2-methyl-1h-indol-3-yl](2,2,3,3-tetramethylcyclopropyl)-                                                                                            | Up      |
| 22  | Spiroxamine                                                                                                                                                                        | Down    |
| 23  | 2-(1',2',3',4'-tetrahydroxybutyl)quinoxaline                                                                                                                                       | Down    |
| 24  | Norharmane                                                                                                                                                                         | Down    |
| 25  | 6-methoxy-m-toluidine                                                                                                                                                              | Down    |
| 26  | 3-ethylphenol                                                                                                                                                                      | Down    |
| 27  | Acetylcholine                                                                                                                                                                      | Down    |
| 28  | 4-(methylnitrosamino)-1-(3-pyridyl)-1-butanol                                                                                                                                      | Down    |
| 29  | Oxymorphone                                                                                                                                                                        | Down    |
| 30  | Oleoyl-l-carnitine                                                                                                                                                                 | Up      |
| 31  | 5,13,15-trihydroxy-9-methyl-10-oxabicyclo[10.4.0]hexadeca-1(12),13,15-triene-3,11-dione                                                                                            | Down    |
| 32  | Phyllanthin                                                                                                                                                                        | Up      |
| 33  | Dimebon                                                                                                                                                                            | Down    |
| 34  | Trans-cinnamic acid                                                                                                                                                                | Down    |
| 35  | N-(4-hydroxyphenyl)glycine                                                                                                                                                         | Down    |
| 36  | 9,12-epoxy-1h-diindolo[1,2,3-fg:3',2',1'-kl]pyrrolo[3,4-i][1,6]benzodiazocine-10-carboxylic acid, 2,3,9,10,11,12-hexahydro-10-hydroxy-9-methyl-1-oxo-, methyl ester, (9s,10r,12r)- | Down    |
| 37  | Niacinamide                                                                                                                                                                        | Up      |
| 38  | 2-chloro-2',6'-diethylacetanilide                                                                                                                                                  | Down    |
| 39  | Triptophenolide                                                                                                                                                                    | Down    |
| 40  | 2,6-di-tert-butyl-4-hydroxymethylphenol                                                                                                                                            | Up      |

Up: DQMs up-regulated; Down: DQMs down-regulated.

**Table S3** DQMs between BG and GC

| No. | Name                                                         | Up-Down |
|-----|--------------------------------------------------------------|---------|
| 1   | 1-hexadecanoyl-2-octadecadienoyl-sn-glycero-3-phosphocholine | Up      |
| 2   | D-turanose                                                   | Up      |
| 3   | Nudifloramide                                                | Down    |
| 4   | 2-oleoyl-1-palmitoyl-sn-glycero-3-phosphocholine             | Up      |

|    |                                                  |      |
|----|--------------------------------------------------|------|
| 5  | Acetohexamide                                    | Up   |
| 6  | 1-heptadecanoyl-sn-glycero-3-phosphocholine      | Up   |
| 7  | 6-methoxy-m-toluidine                            | Down |
| 8  | Phencyclidine                                    | Down |
| 9  | Bupirimate                                       | Down |
| 10 | PC(16:0/16:0)                                    | Up   |
| 11 | O-anisidine                                      | Down |
| 12 | 3-hydroxy-c14 homoserine lactone                 | Up   |
| 13 | 2-butoxypyridine                                 | Down |
| 14 | 2-(2-ethoxyethyl)pyridine                        | Down |
| 15 | Oleamide                                         | Down |
| 16 | Ropinirole                                       | Down |
| 17 | Thiocarlide                                      | Down |
| 18 | Bis(2,2,6,6-tetramethyl-4-piperidyl) sebacate    | Up   |
| 19 | 4-acetamidoantipyrin                             | Up   |
| 20 | Cyproheptadine                                   | Down |
| 21 | L-pipecolic acid                                 | Up   |
| 22 | P-phenetidine                                    | Down |
| 23 | L-carnitine                                      | Up   |
| 24 | 3-methyladenine                                  | Down |
| 25 | Dixyrazine                                       | Down |
| 26 | 1-(4-isopropylphenyl)-3-methylurea               | Down |
| 27 | Tribenzylamine n-oxide                           | Down |
| 28 | Dodeca-2,4,8,10-tetraenoic acid isobutylamide    | Down |
| 29 | 5,6-dimethylbenzimidazole                        | Down |
| 30 | 1-decanoyl-2-hydroxy-sn-glycero-3-phosphocholine | Up   |
| 31 | Norharmame                                       | Down |
| 32 | Germacrone                                       | Up   |
| 33 | Medicagenic acid                                 | Up   |
| 34 | Cyclo(tyrosyl-prolyl)                            | Down |
| 35 | Buspirone                                        | Down |
| 36 | 2-phenylacetamide                                | Down |
| 37 | 2-sdahma [dmed-fahfa]                            | Up   |
| 38 | 1-methoxyindole-3-carbaldehyde                   | Down |
| 39 | 5-methyl-5,6-dihydrouracil                       | Down |
| 40 | .alpha.-santonin                                 | Down |
| 41 | Clasto-lactacystin .beta.-lactone                | Down |
| 42 | Cyclo(proline-leucine)                           | Down |
| 43 | Retinene                                         | Down |

Up: DQMs up-regulated; Down: DQMs down-regulated.

**Table S4** Differential metabolites (DMs) in PD mice treated with RZ and RZPPs

| No | Name                                             | Up-Down    |             |             |             |              |              |
|----|--------------------------------------------------|------------|-------------|-------------|-------------|--------------|--------------|
|    |                                                  | N vs.<br>C | C vs.<br>RZ | C vs.<br>BG | C vs.<br>GC | RZ vs.<br>BG | BG vs.<br>GC |
| 1  | DL-arginine                                      | Up         | -           | -           | -           | -            | -            |
| 2  | Diethyltoluamide                                 | Down       | -           | -           | -           | -            | -            |
| 3  | Acetylcarnitine                                  | Down       | -           | -           | -           | -            | -            |
| 4  | Hypoxanthine                                     | Up         | -           | Up          | -           | Down         | -            |
| 5  | 4-hydroxy-l-isoleucine                           | Down       | -           | -           | -           | -            | -            |
| 6  | Lysine                                           | Down       | -           | -           | -           | -            | -            |
| 7  | 1-pentadecanoyl-sn-glycero-3-phosphocholine      | Up         | -           | -           | -           | -            | -            |
| 8  | Latanoprost                                      | Up         | -           | -           | -           | -            | -            |
| 9  | 1-oleoyl-2-myristoyl-sn-glycero-3-phosphocholine | Down       | -           | -           | -           | -            | -            |
| 10 | Ser-Ser-Arg                                      | Down       | Down        | Down        | Down        | -            | -            |
| 11 | Fenpropidin                                      | -          | -           | Down        | -           | -            | Down         |
| 12 | Phytosphingosine                                 | -          | -           | -           | Up          | -            | Down         |

|    |                                                                                   |      |   |    |      |      |   |
|----|-----------------------------------------------------------------------------------|------|---|----|------|------|---|
| 13 | Fenfluramine                                                                      | -    | - | -  | Up   | -    | - |
| 14 | Urea                                                                              | -    | - | -  | -    | Up   | - |
| 15 | Phosphocholine                                                                    | -    | - | -  | -    | Down | - |
| 16 | 1-palmitoyl-2-docosahexaenoyl-sn-glycero-3-phosphocholine                         | Down | - | -  | -    | -    | - |
| 17 | Prostaglandin f2.beta.                                                            | Down | - | -  | -    | -    | - |
| 18 | 1-hexadecyl-2-(5z,8z,11z,14z-eicosatetraenoyl)-sn-glycero-3-phosphocholine        | Down | - | -  | -    | -    | - |
| 19 | 1-(1z-octadecenyl)-2-(5z,8z,11z,14z-eicosatetraenoyl)-sn-glycero-3-phosphocholine | Down | - | -  | -    | -    | - |
| 20 | 4-aminopyridine                                                                   | Up   | - | Up | -    | Down | - |
| 21 | Gln-gln                                                                           | -    | - | -  | Down | -    | - |
| 22 | Pro-pro                                                                           | -    | - | -  | -    | Down | - |

N: Normal group; C: Control group; RZ: Rhizoma zingiberis group; BG: Baked ginger group; GC: Ginger charcoal group; Up: up-regulated DMs; Down: down-regulated DMs.
