# Supplementary figures and images for: The mechanism of ginger and its processed products in the treatment of estradiol valerate coupled with oxytocin-induced dysmenorrhea in miceviaregulating the TRP ion channel-mediated ERK1/2/NF-κB signaling pathway
Source: Royal Society of Chemistry journal article supplement (doi:10.1039/d2fo01845d), 2022-01-01

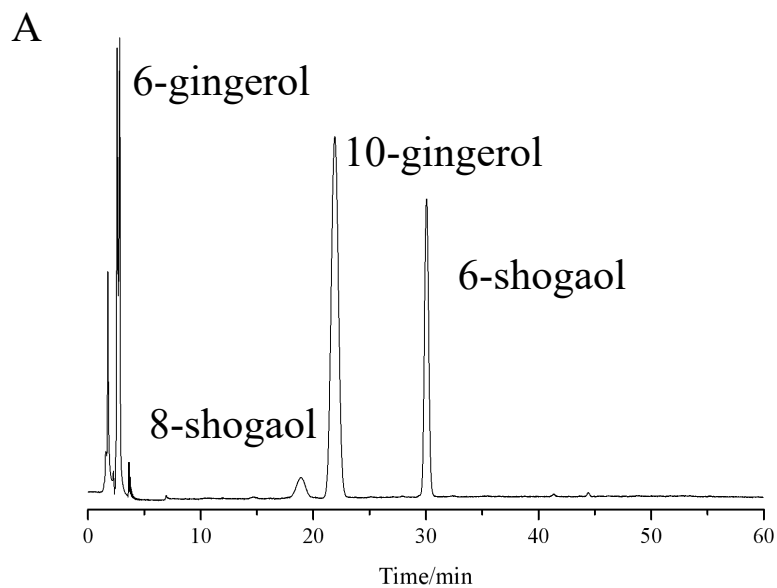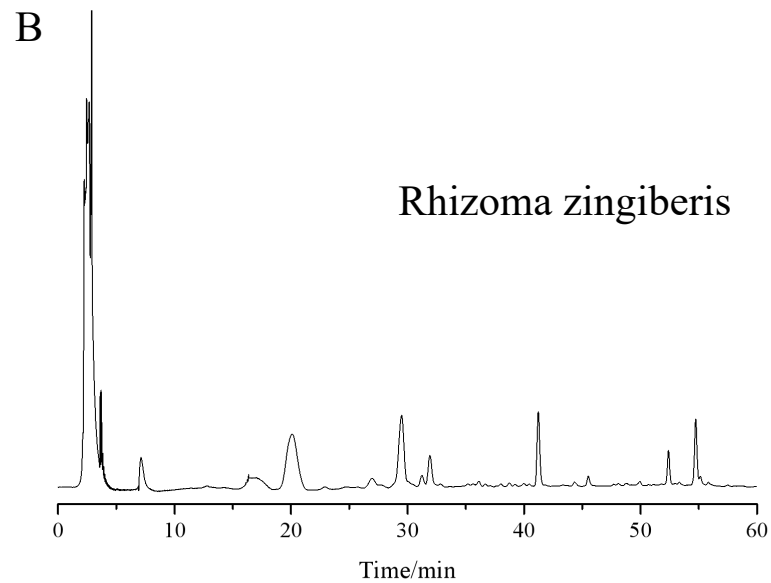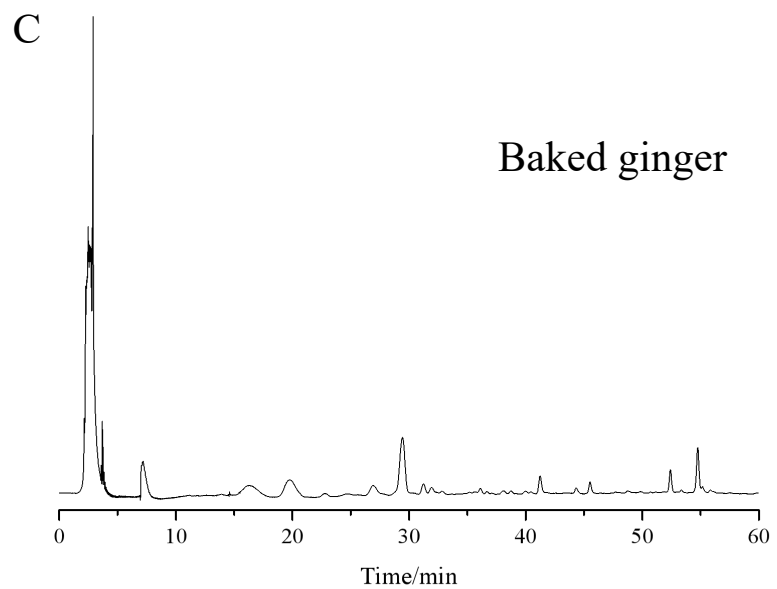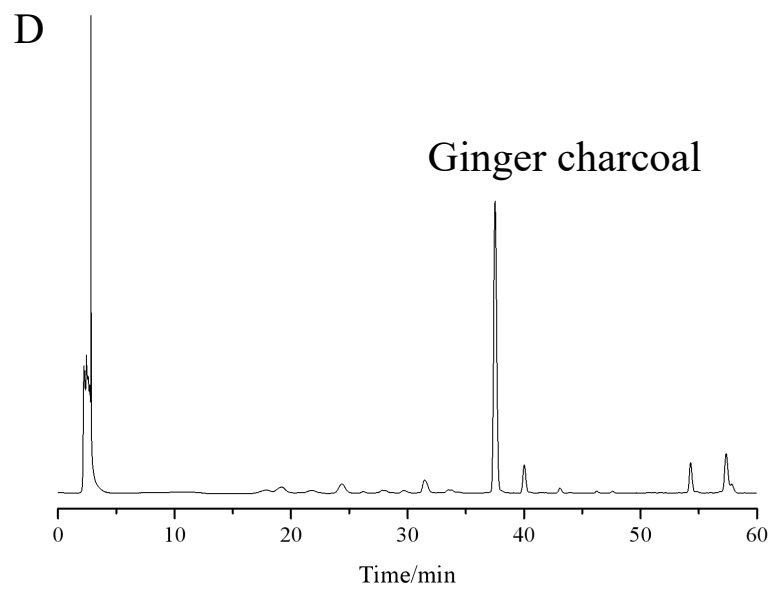

Supplement: d2fo01845d3.pdf [file d2fo01845d3.pdf]

A

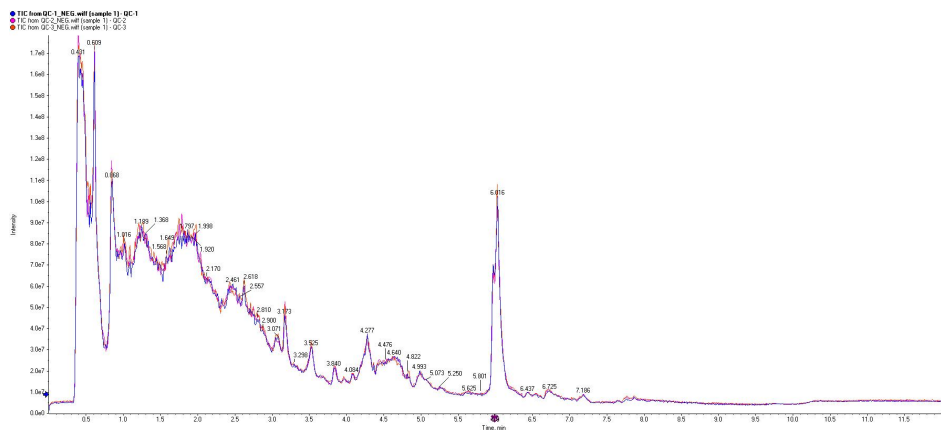

B

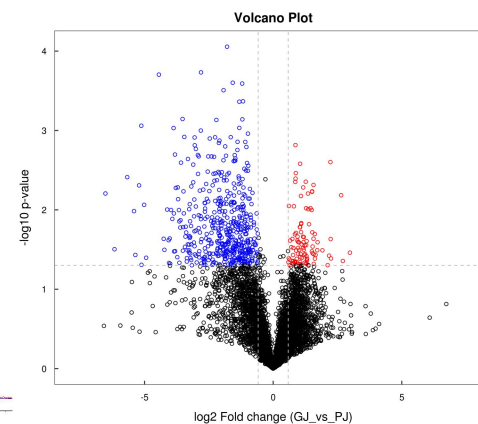

C

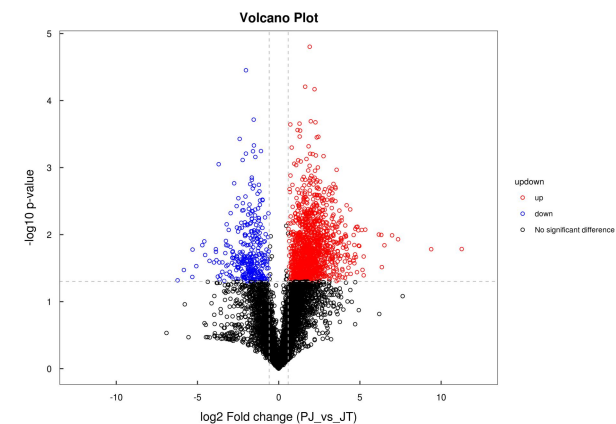

D

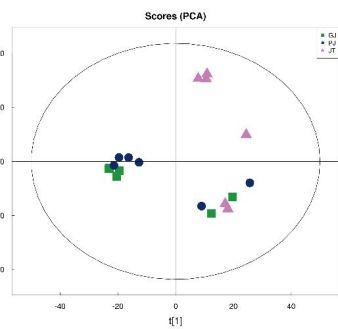

E

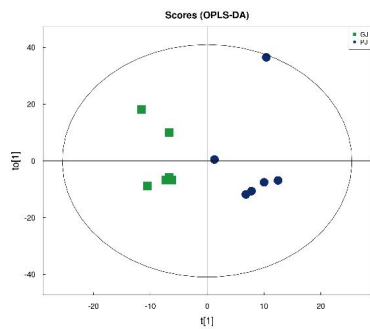

F

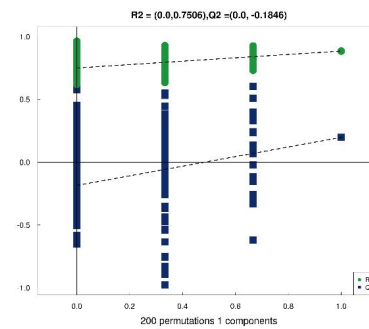

G

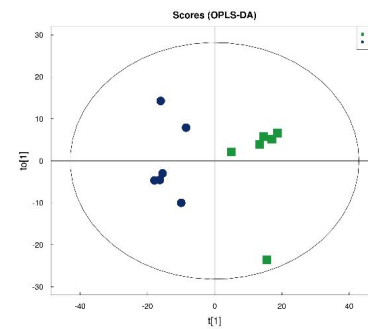

H

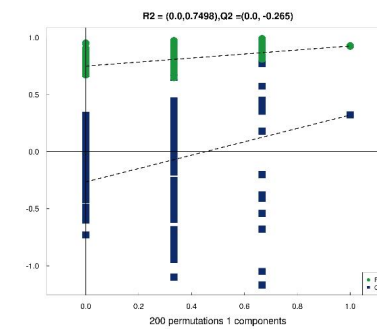

Supplement: d2fo01845d4.pdf [file d2fo01845d4.pdf]

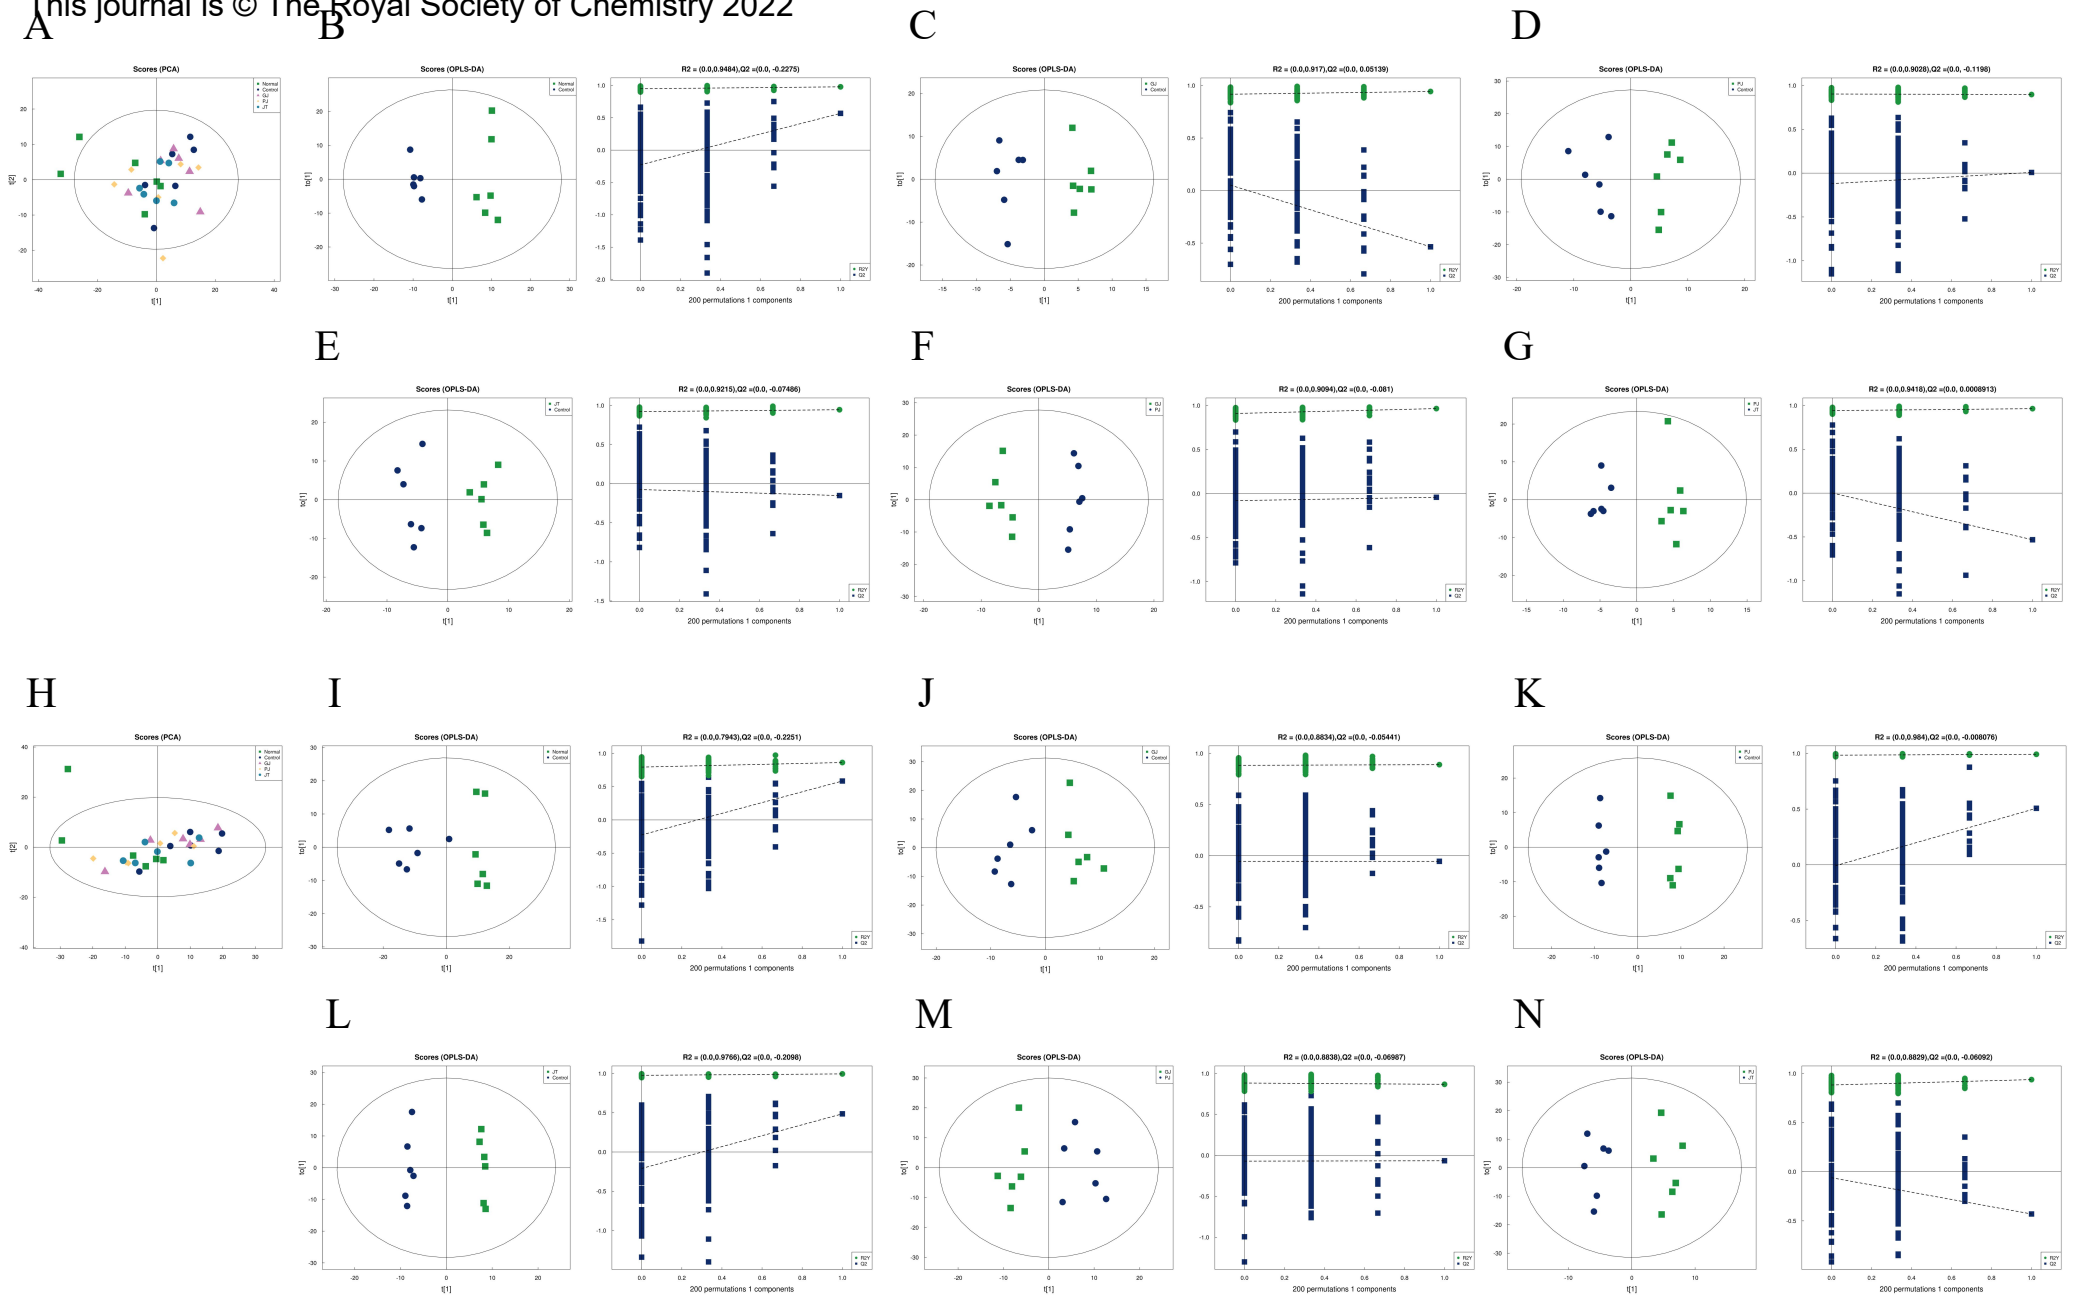

Supplement: d2fo01845d5.pdf [file d2fo01845d5.pdf]
